# Supplementary material
Source: PubMed Central journal article supplement (PMC4367445)
Supplement: NIHMS669699-supplement-Supplement.pdf [file NIHMS669699-supplement-Supplement.pdf]

Supporting Information for the manuscript  
**Characterizing sialic acid variants at the  
glycopeptide level**

Katalin F. Medzihradzsky, Krista Kaasik, Robert J. Chalkley

Department of Pharmaceutical Chemistry, School of Pharmacy,  
University of California San Francisco, 600 16th Street Genentech Hall,  
N474A, Box 2240, San Francisco, California 94158-2517, United States

RT: 38.00 - 52.37

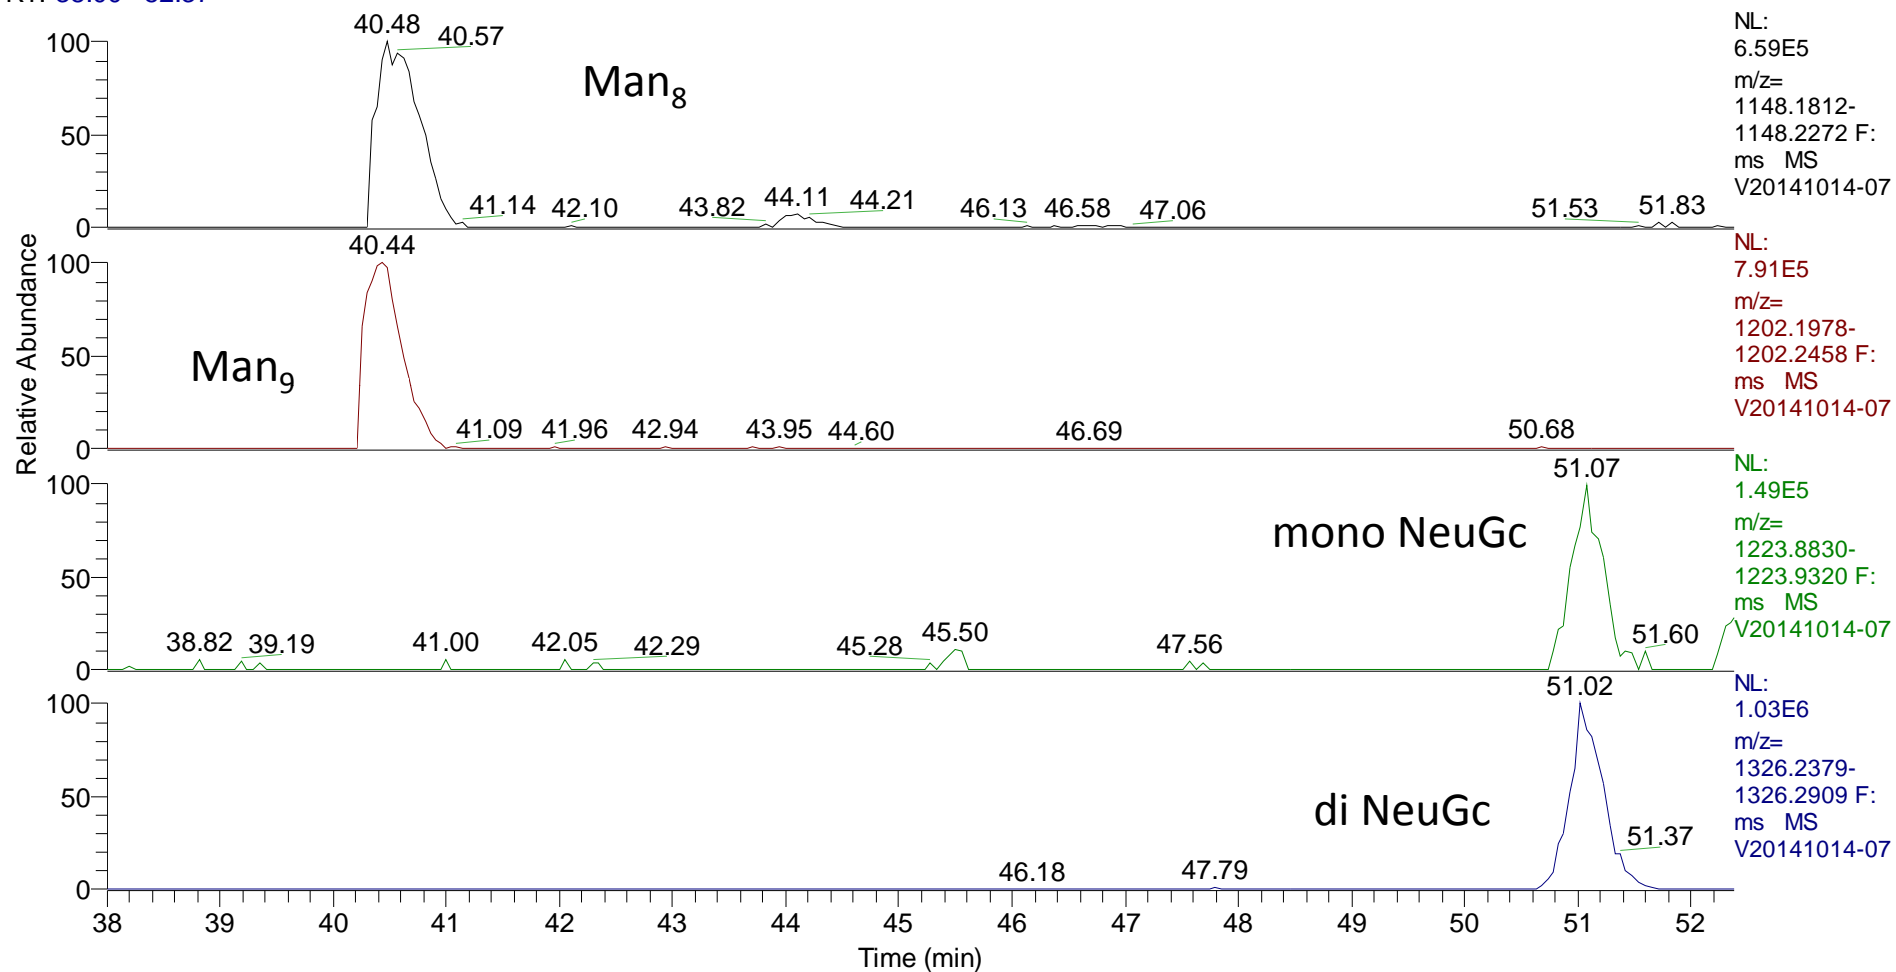

**Supplementary Figure 1.** XIC of the calculated (3+) ions for the Man<sub>8</sub>, Man<sub>9</sub>, biantennary mono-NeuGc, and biantennary di-NeuGc glycoforms of mouse haptoglobin N-glycopeptide <sup>177</sup>VVLHPNgHSVVDIGLIK<sup>192</sup>

V20141014-07 #5692-5738 RT: 50.92-51.23 AV: 7 NL: 2.15E6  
T: FTMS + p NSI Full ms [350.00-1600.00]

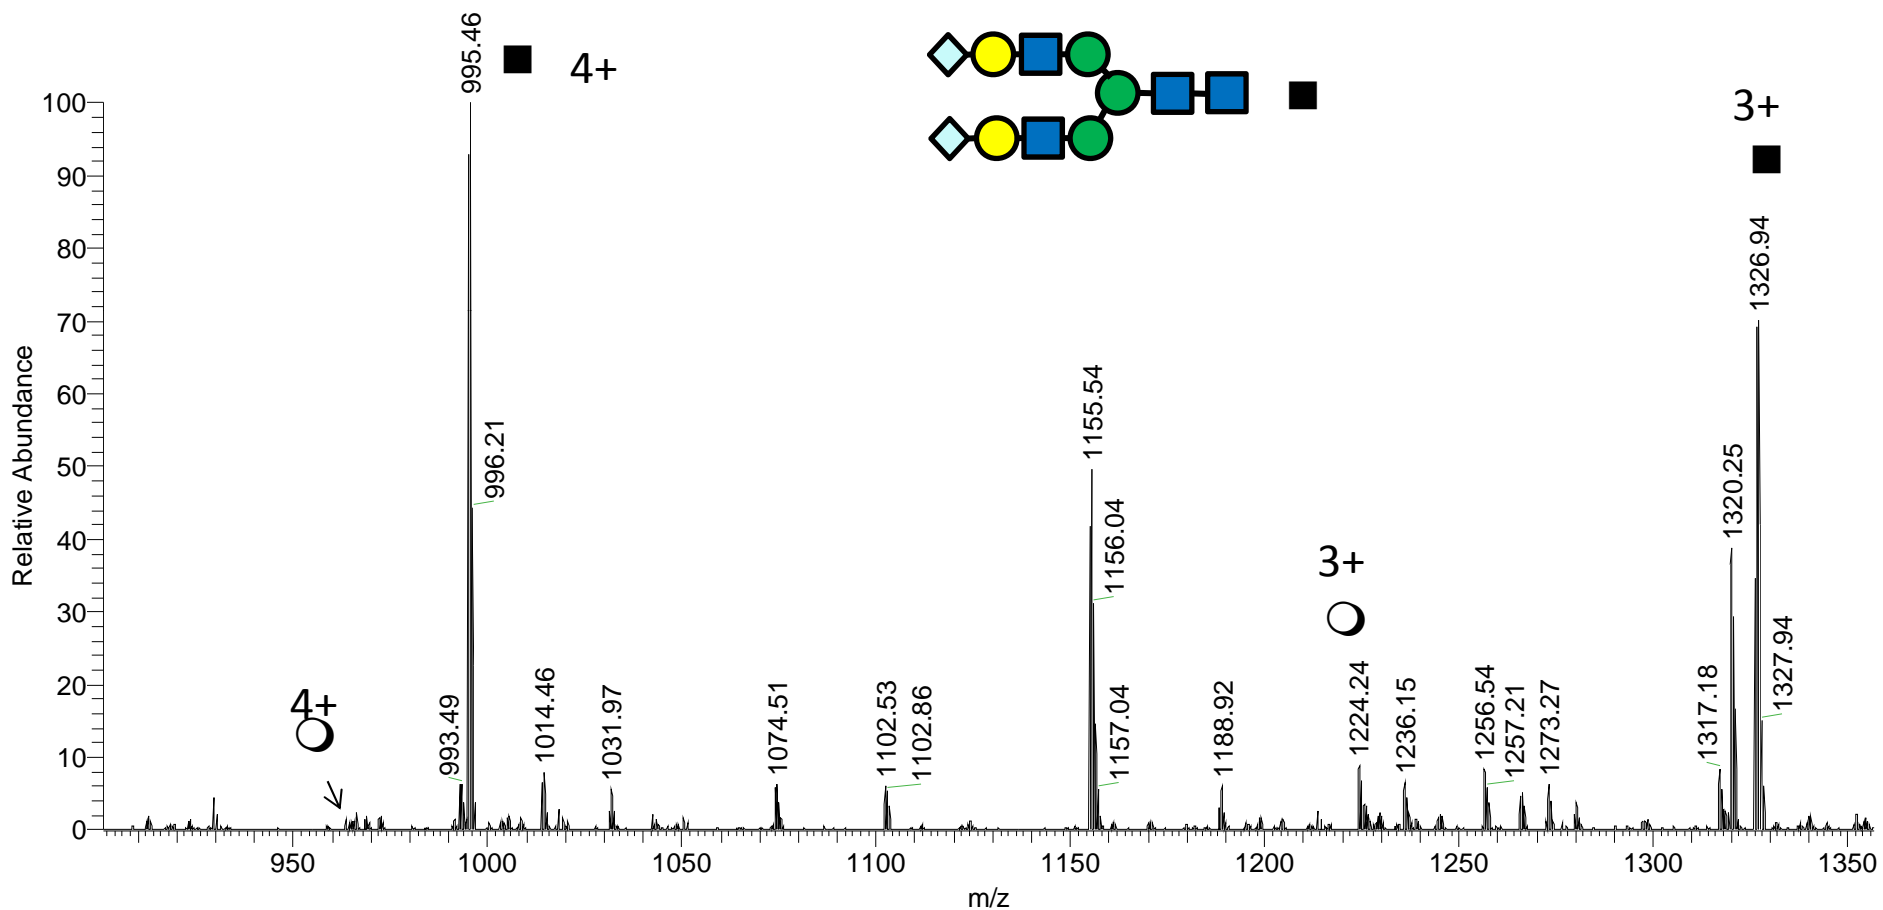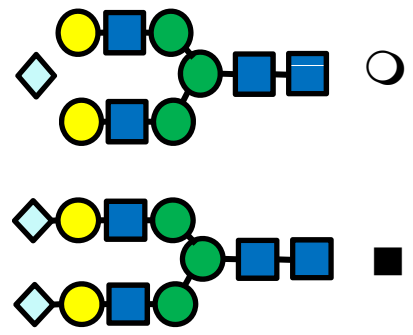

**Supplementary Figure 2.** Combined MS scans across the chromatographic peak of the “coeluting” biantennary mono- and di-NeuGc glycoforms.
